# Supplementary material
Source: PubMed Central journal article supplement (PMC7267850)
Supplement: jama-323-2170-s001.pdf [file jama-323-2170-s001.pdf]

## Supplementary Online Content

Man S, Xian Y, Holmes DN, et al. Association between thrombolytic door-to-needle time and 1-year mortality and readmission in patients with acute ischemic stroke. *JAMA*. doi:10.1001/jama.2020.5697

**eFigure.** Spline plots of one-year outcomes in relationship to door-to-needle times

**eTable 1.** Patient and hospital characteristics by door-to-needle times of 45 minutes and 60 minutes

**eTable 2.** Comparison of patient characteristics of included and excluded population

**eTable 3.** Sensitivity analysis: outcomes at one year by door-to-needle times of 45 minutes and 60 minutes in 2015 and 2016

**eTable 4.** Outcomes at one year by door-to-needle time in 60-minute increments

**eTable 5.** Outcomes at one year by door-to-needle time in 45-minute increments

**eTable 6.** Sensitivity analysis: outcomes at one year by door-to-needle times in 15-minute increments in 2015 and 2016

This supplementary material has been provided by the authors to give readers additional information about their work.

**eFigure.** Spline plots of one-year outcomes in relationship to door-to-needle times

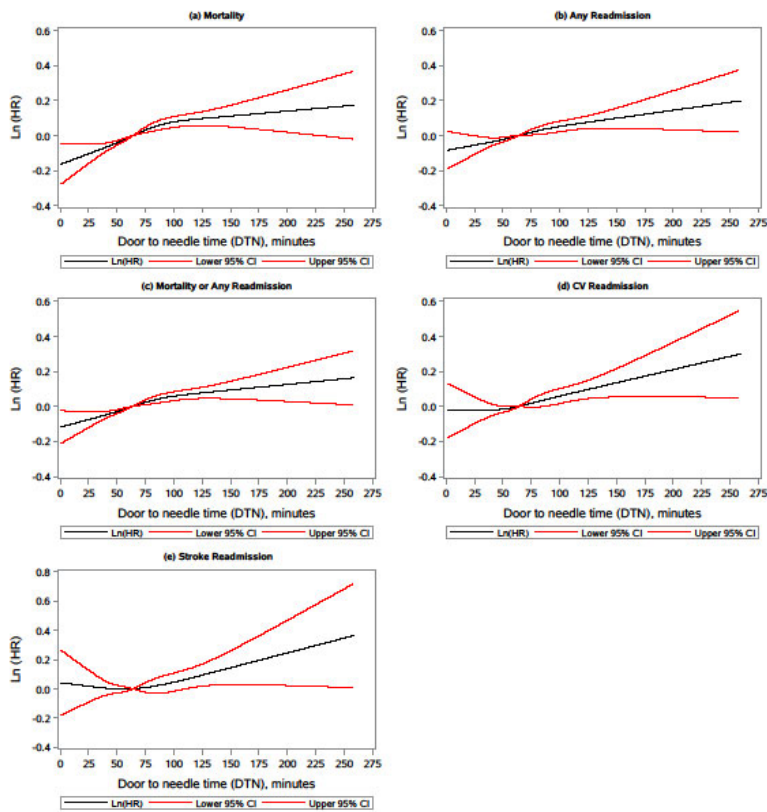

Footnote: The spline plots provided a graphical representation of the relationship between door-to-needle times and each outcome of interest (on the natural log scale) and allowed for detection of non-linearity. When the linearity assumption was violated, pictorially, there was a change in the direction of the displayed curve. Linear splines could then be used to approximate the curve through a series of straight lines with a knot point placed where the slope of the straight lines approximating the relationship curve change. The point where the line crossed zero was when the relationship between door-to-needle times and the outcome changed from being less likely to have the outcome to being more likely to have the outcome.

(a) All-cause mortality in one year showed non-linear distribution in relation to door-to-needle times in 15-minute increments with a cut-off at 90 minutes; (b) All-cause readmission outcomes showed linear distribution in relation to door-to-needle times in 15-minute increments within 4.5 hours.; (c) All-cause mortality or any readmission showed linear distribution in relation to door-to-needle times in 15-minute increments within 4.5 hours; (d) Cardiovascular readmission showed non-linear distribution in relation to door-to-needle times in 15-minute increments with a cut-off at 60 minutes; (e) Recurrent stroke readmission showed non-linear distribution in relation to door-to-needle times in 15-minute increments with a cut-off at 60 minutes. Stroke readmission was defined as readmissions with the diagnosis of transient ischemic attack, ischemic and hemorrhagic stroke, carotid endarterectomy or stenting, but not direct complications of index stroke.

Abbreviation: Ln, natural log; CI, confidence interval; CV readmission, cardiovascular readmission.

**eTable 1.** Patient and hospital characteristics by door-to-needle times of 45 minutes and 60 minutes

| Door-to-Needle Time                         | Overall          | ≤45 min          | >45 min          | Standardized Difference | ≤60 min          | >60 min          | Standardized Difference |
|---------------------------------------------|------------------|------------------|------------------|-------------------------|------------------|------------------|-------------------------|
| Number of patients (%)                      | 61426            | 12760<br>(20.8%) | 48666<br>(79.2%) |                         | 27059<br>(44.1%) | 34367<br>(55.9%) |                         |
| Age, years, Median (IQR)                    | 80<br>(73-86)    | 79<br>(72-86)    | 80<br>(73-86)    | 4.09                    | 80<br>(73-86)    | 80<br>(73-86)    | 2.94                    |
| 65-74                                       | 18658<br>(30.4%) | 4095<br>(32.1%)  | 14563<br>(29.9%) | 4.71                    | 8491<br>(31.4%)  | 10167<br>(29.6%) | 4.08                    |
| 75-84                                       | 23331<br>(38.0%) | 4743<br>(37.2%)  | 18588<br>(38.2%) |                         | 10054<br>(37.2%) | 13277<br>(38.6%) |                         |
| 85+                                         | 19437<br>(31.6%) | 3922<br>(30.7%)  | 15515<br>(31.9%) |                         | 8514<br>(31.5%)  | 10923<br>(31.8%) |                         |
| Male                                        | 26715<br>(43.5%) | 5887<br>(46.1%)  | 20828<br>(42.8%) | 6.72                    | 12259<br>(45.3%) | 14456<br>(42.1%) | 6.54                    |
| Female                                      | 34711<br>(56.5%) | 6873<br>(53.9%)  | 27838<br>(57.2%) |                         | 14800<br>(54.7%) | 19911<br>(57.9%) |                         |
| <b>Race-Ethnicity, N</b>                    | 61340            | 12748            | 48592            |                         | 27030            | 34310            |                         |
| White, non-Hispanic                         | 50324<br>(82.0%) | 10460<br>(82.1%) | 39864<br>(82.0%) | 3.59                    | 22119<br>(81.8%) | 28205<br>(82.2%) | 2.88                    |
| Black, non-Hispanic                         | 5329 (8.7%)      | 1076 (8.4%)      | 4253 (8.8%)      |                         | 2315 (8.6%)      | 3014 (8.8%)      |                         |
| Hispanic                                    | 2452 (4.0%)      | 472 (3.7%)       | 1980 (4.1%)      |                         | 1075 (4.0%)      | 1377 (4.0%)      |                         |
| Other                                       | 3235 (5.3%)      | 740 (5.8%)       | 2495 (5.1%)      |                         | 1521 (5.6%)      | 1714 (5.0%)      |                         |
| <b>Arrival mode, N</b>                      | 58652            | 12370            | 46282            |                         | 26060            | 32592            |                         |
| Emergency Medical Service                   | 49797<br>(84.9%) | 10670<br>(86.3%) | 39127<br>(84.5%) | 19.56                   | 22360<br>(85.8%) | 27437<br>(84.2%) | 14.41                   |
| Private transport                           | 7617 (13.0%)     | 1226 (9.9%)      | 6391 (13.8%)     |                         | 2960<br>(11.4%)  | 4657<br>(14.3%)  |                         |
| Transfer from other hospital                | 889 (1.5%)       | 413 (3.3%)       | 476 (1.0%)       |                         | 606 (2.3%)       | 283 (0.9%)       |                         |
| Unknown                                     | 349 (0.6%)       | 61 (0.5%)        | 288 (0.6%)       |                         | 134 (0.5%)       | 215 (0.7%)       |                         |
| Arrival during off hours <sup>a</sup>       | 31938<br>(52.0%) | 5657<br>(44.3%)  | 26281<br>(54.0%) | 19.43                   | 12895<br>(47.7%) | 19043<br>(55.4%) | 15.57                   |
| <b>Vascular Risk Factors<sup>b</sup>, N</b> | 61006            | 12644            | 48362            |                         | 26855            | 34151            |                         |
| Atrial fibrillation/flutter                 | 17992<br>(29.5%) | 3429<br>(27.1%)  | 14563<br>(30.1%) | 6.63                    | 7450<br>(27.7%)  | 10542<br>(30.9%) | 6.88                    |

| <b>Door-to-Needle Time</b>                           | <b>Overall</b>   | <b>≤45 min</b>  | <b>&gt;45 min</b> | <b>Standardized Difference</b> | <b>≤60 min</b>   | <b>&gt;60 min</b> | <b>Standardized Difference</b> |
|------------------------------------------------------|------------------|-----------------|-------------------|--------------------------------|------------------|-------------------|--------------------------------|
| Coronary artery disease /prior myocardial infarction | 18205<br>(29.8%) | 3544<br>(28.0%) | 14661<br>(30.3%)  | 5.03                           | 7692<br>(28.6%)  | 10513<br>(30.8%)  | 4.69                           |
| Carotid stenosis                                     | 2140 (3.5%)      | 428 (3.4%)      | 1712 (3.5%)       | 0.85                           | 906 (3.4%)       | 1234 (3.6%)       | 1.31                           |
| Diabetes mellitus                                    | 16144<br>(26.5%) | 3245<br>(25.7%) | 12899<br>(26.7%)  | 2.29                           | 6936<br>(25.8%)  | 9208<br>(27.0%)   | 2.58                           |
| Dyslipidemia                                         | 28223<br>(46.3%) | 5889<br>(46.6%) | 22334<br>(46.2%)  | 0.79                           | 12575<br>(46.8%) | 15648<br>(45.8%)  | 2.02                           |
| Heart Failure                                        | 6675 (10.9%)     | 1335<br>(10.6%) | 5340 (11.0%)      | 1.56                           | 2873<br>(10.7%)  | 3802<br>(11.1%)   | 1.39                           |
| Hypertension                                         | 48063<br>(78.8%) | 9817<br>(77.6%) | 38246<br>(79.1%)  | 3.50                           | 20977<br>(78.1%) | 27086<br>(79.3%)  | 2.93                           |
| Peripheral artery disease                            | 2742 (4.5%)      | 518 (4.1%)      | 2224 (4.6%)       | 2.46                           | 1128 (4.2%)      | 1614 (4.7%)       | 2.55                           |
| Previous stroke/transient ischemic attack            | 16285<br>(26.7%) | 3057<br>(24.2%) | 13228<br>(27.4%)  | 7.26                           | 6681<br>(24.9%)  | 9604<br>(28.1%)   | 7.36                           |
| Smoker                                               | 5423 (8.9%)      | 1207 (9.5%)     | 4216 (8.7%)       | 2.88                           | 2528 (9.4%)      | 2895 (8.5%)       | 3.28                           |
| <b>Initial NIHSS, N</b>                              | 57812            | 12385           | 45427             |                                | 26114            | 31698             |                                |
| Median (IQR)                                         | 10<br>(6-18)     | 10<br>(6-17)    | 10<br>(6-18)      | 2.39                           | 10<br>(6-17)     | 11<br>(5-18)      | 2.32                           |
| 0-4                                                  | 10371<br>(17.9%) | 2081<br>(16.8%) | 8290 (18.2%)      | 6.44                           | 4439<br>(17.0%)  | 5932<br>(18.7%)   | 7.40                           |
| 5-9                                                  | 16242<br>(28.1%) | 3642<br>(29.4%) | 12600<br>(27.7%)  |                                | 7659<br>(29.3%)  | 8583<br>(27.1%)   |                                |
| 10-14                                                | 10786<br>(18.7%) | 2410<br>(19.5%) | 8376 (18.4%)      |                                | 4988<br>(19.1%)  | 5798<br>(18.3%)   |                                |
| 15-20                                                | 10893<br>(18.8%) | 2358<br>(19.0%) | 8535 (18.8%)      |                                | 4962<br>(19.0%)  | 5931<br>(18.7%)   |                                |
| >20                                                  | 9520 (16.5%)     | 1894<br>(15.3%) | 7626 (16.8%)      |                                | 4066<br>(15.6%)  | 5454<br>(17.2%)   |                                |
| Onset-to-Arrival Time, min, median (IQR)             | 60<br>(40-90)    | 66<br>(43-110)  | 58<br>(39-87)     | 31.15                          | 65<br>(42-105)   | 56<br>(38-82)     | 34.51                          |
| Door-to-Needle Time, min, median (IQR)               | 65<br>(49-88)    | 37<br>(30-42)   | 74<br>(59-95)     | 221.83                         | 46<br>(37-54)    | 85<br>(72-104)    | 234.19                         |

| Door-to-Needle Time                                    | Overall               | ≤45 min             | >45 min               | Standardized Difference | ≤60 min             | >60 min               | Standardized Difference |
|--------------------------------------------------------|-----------------------|---------------------|-----------------------|-------------------------|---------------------|-----------------------|-------------------------|
| Onset-to-Needle Time, min, median (IQR)                | 137<br>(106-170)      | 102<br>(78-147)     | 144<br>(115-173)      | 67.05                   | 112<br>(88-151)     | 150<br>(125-175)      | 72.57                   |
| <60                                                    | 1075 (1.8%)           | 946 (7.4%)          | 129 (0.3%)            | 86.88                   | 1056 (3.9%)         | 19 (0.1%)             | 92.92                   |
| 60-90                                                  | 7652 (12.5%)          | 4062<br>(31.8%)     | 3590 (7.4%)           |                         | 6810<br>(25.2%)     | 842 (2.5%)            |                         |
| 91-120                                                 | 14076<br>(22.9%)      | 2966<br>(23.2%)     | 11110<br>(22.8%)      |                         | 7686<br>(28.4%)     | 6390<br>(18.6%)       |                         |
| 121-180                                                | 28896<br>(47.0%)      | 3383<br>(26.5%)     | 25513<br>(52.4%)      |                         | 8354<br>(30.9%)     | 20542<br>(59.8%)      |                         |
| 181-270                                                | 9727 (15.8%)          | 1403<br>(11.0%)     | 8324 (17.1%)          |                         | 3153<br>(11.7%)     | 6574<br>(19.1%)       |                         |
| <b>Reason for tPA Delay, n/N (%)</b>                   |                       |                     |                       |                         |                     |                       |                         |
| Not documented <sup>c</sup>                            | 7555/15940<br>(47.4%) | -                   | 7555/15940<br>(47.4%) |                         | -                   | 7555/15940<br>(47.4%) |                         |
| Unable to determine eligibility <sup>d</sup>           | 3192/4650<br>(68.6%)  | -                   | 3192/4650<br>(68.6%)  |                         | -                   | 3192/1650<br>(68.6%)  |                         |
| Hypertension requiring aggressive control <sup>d</sup> | 2498/3330<br>(75.0%)  | -                   | 2498/3330<br>(75.0%)  |                         | -                   | 2498/3330<br>(75.0%)  |                         |
| In-hospital delay <sup>e</sup>                         | 1666/2608<br>(63.9%)  | -                   | 1666/2608<br>(63.9%)  |                         | -                   | 1666/2608<br>(63.9%)  |                         |
| <b>Hospital Characteristics at Patient Level</b>       |                       |                     |                       |                         |                     |                       |                         |
| <b>Regional Distribution<sup>f</sup></b>               |                       |                     |                       | 9.15                    |                     |                       | 8.49                    |
| South                                                  | 23486<br>(38.2%)      | 5165<br>(40.5%)     | 18321<br>(37.6%)      |                         | 10611<br>(39.2%)    | 12875<br>(37.5%)      |                         |
| Northeast                                              | 14975<br>(24.4%)      | 2884<br>(22.6%)     | 12091<br>(24.8%)      |                         | 6345<br>(23.4%)     | 8630<br>(25.1%)       |                         |
| Midwest                                                | 11734<br>(19.1%)      | 2211<br>(17.3%)     | 9523 (19.6%)          |                         | 4827<br>(17.8%)     | 6907<br>(20.1%)       |                         |
| West                                                   | 11231<br>(18.3%)      | 2500<br>(19.6%)     | 8731 (17.9%)          |                         | 5276<br>(19.5%)     | 5955<br>(17.3%)       |                         |
| Rural Location <sup>g</sup> , n/N (%)                  | 1818/61376<br>(3.0%)  | 289/12757<br>(2.3%) | 1529/48619<br>(3.1%)  | 5.42                    | 700/27050<br>(2.6%) | 1118/34326<br>(3.3%)  | 3.97                    |
| Total number of beds, median (IQR)                     | 380<br>(260-585)      | 424<br>(294-648)    | 370<br>(254-555)      | 16.18                   | 405<br>(276-620)    | 365<br>(249-546)      | 12.83                   |
| Annual ischemic stroke volume, median (IQR)            | 266<br>(183-405)      | 313<br>(210-455)    | 255<br>(178-390)      | 26.97                   | 295<br>(198-438)    | 250<br>(173-379)      | 23.20                   |

| Door-to-Needle Time                       | Overall                | ≤45 min                | >45 min                | Standardized Difference | ≤60 min                | >60 min                | Standardized Difference |
|-------------------------------------------|------------------------|------------------------|------------------------|-------------------------|------------------------|------------------------|-------------------------|
| Annual volume of intravenous tPA          | 29 (18-43)             | 36 (22-51)             | 28 (17-41)             | 37.46                   | 33 (21-48)             | 26 (16-39)             | 32.55                   |
| Teaching hospital <sup>h</sup><br>n/N (%) | 47145/60675<br>(77.7%) | 10215/12640<br>(80.8%) | 36930/48034<br>(76.9%) | 9.62                    | 21370/26781<br>(79.8%) | 25775/33894<br>(76.0%) | 9.05                    |
| Primary stroke center <sup>i</sup>        | 44986<br>(73.2%)       | 9246<br>(72.5%)        | 35740<br>(73.4%)       | 2.20                    | 19781<br>(73.1%)       | 25205<br>(73.3%)       | 0.54                    |

Abbreviations: NIHSS, National Institute of Health Stroke Scale; tPA, tissue-type plasminogen activator.

Data were expressed as n (%) unless specified. For variables with missing data, the number of patients with complete data was specified in the cell of the variable.

Standardized difference was calculated as the difference in means or proportions divided by a pooled estimate of the standard deviation and multiplied by 100 to get a percentage of a variable. Standardized difference greater than 10% was considered significant imbalance.

<sup>a</sup> Regular hour arrival was defined as arriving 7:00 Am to 6:00 Pm on any weekday. Off hour arrival was defined as presenting any other time, including evenings, nights, weekends and during national holidays.

<sup>b</sup> Vascular risk factors were calculated among patients who responded to at least one of the variables in the medical history panel from the data report form.

<sup>c</sup> The percentages were among patients admitted in October 2012 and after.

<sup>d</sup> The percentages were among patients admitted in October 2012 and after with a documented eligibility or medical reason for delay. A patient may have more than one reason documented.

<sup>e</sup> The percentages were among patients admitted in October 2012 and after without a eligibility or medical reason documented as a cause for delay. A patient may have more than one reason documented.

<sup>f</sup> Regional distribution was defined by the US Census Bureau.

<sup>g</sup> Rural location was defined by the US Office of Management and Budget as areas other than Metropolitan Statistical Area.

<sup>h</sup> Teaching hospital was identified based on American Hospital Association data.

<sup>i</sup> Primary stroke centers received their certifications from the Joint Commission, state health department, Healthcare Facilities Accreditation Program or Det Norske Veritas.

**eTable 2.** Comparison of patient characteristics of included and excluded population

| Variable                                            | Overall<br>n=102621 | Included<br>n=61426 | Excluded <sup>a</sup><br>n=41195 | Standardized<br>Differences (%) |
|-----------------------------------------------------|---------------------|---------------------|----------------------------------|---------------------------------|
| Total Patients                                      |                     |                     |                                  |                                 |
| Age, years, median (IQR)                            | 79 (72-86)          | 80 (73-86)          | 78 (71-85)                       | 15.87                           |
| 65-74                                               | 33553 (32.7%)       | 18658 (30.4%)       | 14895 (36.2%)                    | 15.20                           |
| 75-84                                               | 39097 (38.1%)       | 23331 (38.0%)       | 15766 (38.3%)                    |                                 |
| 85+                                                 | 29971 (29.2%)       | 19437 (31.6%)       | 10534 (25.6%)                    |                                 |
| Male                                                | 45533 (44.4%)       | 26715 (43.5%)       | 18818 (45.7%)                    | 4.41                            |
| Female                                              | 57088 (55.6%)       | 34711 (56.5%)       | 22377 (54.3%)                    |                                 |
| <b>Race-Ethnicity</b>                               |                     |                     |                                  | 30.86                           |
| White, non-Hispanic                                 | 79008 (77.1%)       | 50324 (82.0%)       | 28684 (69.7%)                    |                                 |
| Black, non-Hispanic                                 | 10347 (10.1%)       | 5329 (8.7%)         | 5018 (12.2%)                     |                                 |
| Hispanic                                            | 6430 (6.3%)         | 2452 (4.0%)         | 3978 (9.7%)                      |                                 |
| Other                                               | 6682 (6.5%)         | 3235 (5.3%)         | 3447 (8.4%)                      |                                 |
| <b>Arrival Mode</b>                                 |                     |                     |                                  | 3.59                            |
| Arrival by emergency medical services               | 82952 (84.5%)       | 49797 (84.9%)       | 33155 (83.9%)                    |                                 |
| Private Transport                                   | 13190 (13.4%)       | 7617 (13.0%)        | 5573 (14.1%)                     |                                 |
| Transfer from other hospital                        | 1473 (1.5%)         | 889 (1.5%)          | 584 (1.5%)                       |                                 |
| Unknown                                             | 539 (0.5%)          | 349 (0.6%)          | 190 (0.5%)                       |                                 |
| Arrival During Off Hours <sup>b</sup>               | 53673 (52.3%)       | 31938 (52.0%)       | 21735 (52.8%)                    | 1.54                            |
| <b>Vascular Risk Factors</b>                        |                     |                     |                                  |                                 |
| Atrial Fibrillation/Flutter                         | 28828 (28.3%)       | 17992 (29.5%)       | 10836 (26.5%)                    | 6.61                            |
| Coronary artery disease/prior myocardial infarction | 29446 (28.9%)       | 18205 (29.8%)       | 11241 (27.5%)                    | 5.15                            |
| Carotid stenosis                                    | 3494 (3.4%)         | 2140 (3.5%)         | 1354 (3.3%)                      | 1.07                            |
| Diabetes Mellitus                                   | 28267 (27.8%)       | 16144 (26.5%)       | 12123 (29.7%)                    | 7.15                            |
| Dyslipidemia                                        | 47414 (46.5%)       | 28223 (46.3%)       | 19191 (47.0%)                    | 1.43                            |
| Heart failure                                       | 10749 (10.6%)       | 6675 (10.9%)        | 4074 (10.0%)                     | 3.17                            |
| Hypertension                                        | 80719 (79.2%)       | 48063 (78.8%)       | 32656 (79.9%)                    | 2.84                            |
| Peripheral artery disease                           | 4400 (4.3%)         | 2742 (4.5%)         | 1658 (4.1%)                      | 2.16                            |
| Prior stroke/ transient ischemic attack             | 27334 (26.8%)       | 16285 (26.7%)       | 11049 (27.0%)                    | 0.79                            |
| Smoker                                              | 9380 (9.2%)         | 5423 (8.9%)         | 3957 (9.7%)                      | 2.74                            |
| <b>NIHSS, median (IQR)</b>                          | 10 (6-18)           | 10 (6-18)           | 10 (5-17)                        | 3.64                            |
| 0-4                                                 | 17766 (18.3%)       | 10371 (17.9%)       | 7395 (18.8%)                     | 3.68                            |
| 5-9                                                 | 27552 (28.4%)       | 16242 (28.1%)       | 11310 (28.8%)                    |                                 |
| 10-14                                               | 18069 (18.6%)       | 10786 (18.7%)       | 7283 (18.6%)                     |                                 |

| Variable                                       | Overall<br>n=102621 | Included<br>n=61426 | Excluded <sup>a</sup><br>n=41195 | Standardized<br>Differences (%) |
|------------------------------------------------|---------------------|---------------------|----------------------------------|---------------------------------|
| 15-20                                          | 18022 (18.6%)       | 10893 (18.8%)       | 7129 (18.2%)                     |                                 |
| >20                                            | 15642 (16.1%)       | 9520 (16.5%)        | 6122 (15.6%)                     |                                 |
| <b>Door-to-Needle Time, min, median (IQR)</b>  | <b>64 (48-87)</b>   | <b>65 (49-88)</b>   | <b>63 (47-85)</b>                | <b>7.08</b>                     |
| ≤30                                            | 6101 (5.9%)         | 3419 (5.6%)         | 2682 (6.5%)                      | 7.65                            |
| 31-45                                          | 16131 (15.7%)       | 9341 (15.2%)        | 6790 (16.5%)                     |                                 |
| 46-60                                          | 24391 (23.8%)       | 14299 (23.3%)       | 10092 (24.5%)                    |                                 |
| 61-75                                          | 18825 (18.3%)       | 11357 (18.5%)       | 7468 (18.1%)                     |                                 |
| >75                                            | 37173 (36.2%)       | 23010 (37.5%)       | 14163 (34.4%)                    |                                 |
| <b>Regional Distribution<sup>c</sup></b>       |                     |                     |                                  | <b>28.60</b>                    |
| South                                          | 36161 (35.2%)       | 23486 (38.2%)       | 12675 (30.8%)                    |                                 |
| Northeast                                      | 25438 (24.8%)       | 14975 (24.4%)       | 10463 (25.4%)                    |                                 |
| Midwest                                        | 17717 (17.3%)       | 11734 (19.1%)       | 5983 (14.5%)                     |                                 |
| West                                           | 23305 (22.7%)       | 11231 (18.3%)       | 12074 (29.3%)                    |                                 |
| Rural location <sup>d</sup>                    | 2447 (2.4%)         | 1818 (3.0%)         | 629 (1.5%)                       | 9.65                            |
| Teaching hospital <sup>e</sup>                 | 79423 (78.5%)       | 47145 (77.7%)       | 32278 (79.6%)                    | 4.72                            |
| Total number of beds, median (IQR)             | 381 (260-583)       | 380 (260-585)       | 381 (260-558)                    | 0.66                            |
| Annual ischemic stroke volume, median (IQR)    | 262 (184-404)       | 266 (183-405)       | 259 (186-401)                    | 0.34                            |
| Annual volume of intravenous tPA, median (IQR) | 30 (19-43)          | 29 (18-43)          | 31 (19-44)                       | 4.31                            |
| Primary stroke center <sup>f</sup>             | 74286 (72.4%)       | 44986 (73.2%)       | 29300 (71.1%)                    | 4.71                            |

Abbreviations: NIHSS, National Institute of Health Stroke Scale; tPA, tissue-type plasminogen activator.

Data were expressed as n (%) unless specified. Standardized difference was calculated as the difference in means or proportions divided by a pooled estimate of the standard deviation and multiplied by 100 to get a percentage of a variable. Standardized difference greater than 10% was considered significant imbalance.

<sup>a</sup>The excluded population were patients aged ≥65 years who were treated with intravenous tPA within 4.5 hours of onset at Get With The Guideline-Stroke hospitals during the study time period otherwise meeting study entry criteria but not matched to the Medicare claims file.

<sup>b</sup>Regular hour arrival was defined as arriving 7:00 Am to 6:00 Pm on any weekday. Off hour arrival was defined as presenting any other time, including evenings, nights, weekends and during national holidays.

<sup>c</sup>Regional distribution was defined by the US Census Bureau.

<sup>d</sup>Rural location was defined by the US Office of Management and Budget as areas other than Metropolitan Statistical Area.

<sup>e</sup>Teaching hospital was identified based on American Hospital Association data.

<sup>f</sup>Primary stroke centers received their certifications from the Joint Commission, state health department, Healthcare Facilities Accreditation Program or Det Norske Veritas.



**eTable 3.** Sensitivity analysis: outcomes at one year by door-to-needle times of 45 minutes and 60 minutes in 2015 and 2016

|                                           | Event Rate, % (95% CI) |                      | Absolute Difference % (95% CI) <sup>a</sup> | Adjusted HR (95% CI) <sup>b</sup> | P value | Event Rate, % (CI)   |                      | Absolute Difference, % (95% CI) <sup>a</sup> | Adjusted HR (95% CI) <sup>b</sup> | P value |
|-------------------------------------------|------------------------|----------------------|---------------------------------------------|-----------------------------------|---------|----------------------|----------------------|----------------------------------------------|-----------------------------------|---------|
|                                           | ≤ 45 min               | >45 min              | >45 min vs ≤ 45 min                         | >45 min vs ≤ 45 min               |         | ≤ 60 min             | >60 min              | >60 min vs ≤ 60 min                          | >60 min vs ≤ 60 min               |         |
| All-cause mortality                       | 29.2<br>(27.8, 30.6)   | 31.8<br>(30.9, 32.9) | 3.1<br>(1.9, 4.3)                           | 1.16<br>(1.08, 1.25)              | <.001   | 33.3<br>(32.4, 34.2) | 36.8<br>(36.1, 37.5) | 1.8<br>(0.7, 3.0)                            | 1.09<br>(1.02, 1.17)              | .002    |
| All-cause readmission                     | 36.8<br>(35.3, 38.3)   | 38.6<br>(37.5, 39.7) | 3.3<br>(1.7, 5.0)                           | 1.11<br>(1.04, 1.19)              | <.001   | 40.5<br>(39.5, 41.5) | 41.9<br>(41.1, 42.7) | 2.7<br>(1.1, 4.3)                            | 1.09<br>(1.02, 1.16)              | .001    |
| All-cause mortality or readmission        | 49.9<br>(48.4, 51.5)   | 52.9<br>(51.8, 54.1) | 3.5<br>(2.1, 4.9)                           | 1.12<br>(1.06, 1.19)              | <.001   | 54.7<br>(53.7, 55.7) | 57.7<br>(56.9, 58.5) | 2.7<br>(1.3, 4.0)                            | 1.09<br>(1.03, 1.15)              | <.001   |
| Cardiovascular readmission                | 16.8<br>(15.8, 17.8)   | 17.9<br>(17.2, 18.6) | 1.6<br>(0.2, 3.1)                           | 1.09<br>(1.01, 1.18)              | .02     | 19.8<br>(19.1, 20.5) | 20.8<br>(20.3, 21.3) | 1.2<br>(-0.2, 2.6)                           | 1.07<br>(0.99, 1.15)              | .09     |
| Recurrent stroke readmission <sup>c</sup> | 8.4<br>(7.7, 9.2)      | 8.7<br>(8.2, 9.2)    | 0.7<br>(-0.4, 1.8)                          | 1.08<br>(0.96, 1.20)              | .19     | 9.2 (8.8, 9.7)       | 9.5<br>(9.2, 9.9)    | 0.2<br>(-0.9, 1.2)                           | 1.02<br>(0.92, 1.13)              | .74     |

The population informed all-cause mortality was 18242. The population informed readmission was 16860. The difference represented in-hospital death.

<sup>a</sup> For absolute difference, a positive value indicates an increase in risk and a negative value indicates a reduction in risk.

<sup>b</sup> Models adjusted for patient age, sex, race-ethnicity; vascular risk factors including atrial fibrillation/flutter, previous stroke/transient ischemic attack, history of coronary artery disease/myocardial infarction, heart failure, carotid stenosis, diabetes mellitus, peripheral artery disease, hypertension, dyslipidemia, smoking, arrival by Emergency Medical Services, arrival during off hours, stroke severity as measured by the National Institutes of Health Stroke Scale (NIHSS), hospital region, urban/rural location, total number of beds, annual ischemic stroke volume, academic status, stroke center certification status.

<sup>c</sup> Recurrent stroke readmission, a post hoc outcome, was defined as readmission for transient ischemic attack, ischemic and hemorrhagic stroke, carotid endarterectomy or stenting, but not direct complications of index stroke.

**eTable 4.** Outcomes at one year by door-to-needle time in 60-minute increments

| Door-to-Needle Time                       | Event Rate, % (95% CI) |                      |                      | Absolute Difference, % (95% CI) <sup>a</sup> |                   | Adjusted Hazard Ratio (95% CI) <sup>b</sup> |         |                      |         |
|-------------------------------------------|------------------------|----------------------|----------------------|----------------------------------------------|-------------------|---------------------------------------------|---------|----------------------|---------|
|                                           | ≤ 60 min               | 61-120 min           | >120 min             | 61-120 min                                   | >120 min          | 61-120 min                                  | P value | >120 min             | P value |
| All-cause mortality                       | 32.1<br>(31.5, 32.7)   | 35.7<br>(35.2, 36.2) | 36.2<br>(34.8, 37.7) | 2.1<br>(1.4, 2.8)                            | 3.3<br>(2.0, 4.7) | 1.10<br>(1.07, 1.13)                        | <.001   | 1.16<br>(1.09, 1.23) | <.001   |
| All-cause readmission                     | 39.1<br>(38.5, 39.7)   | 41.0<br>(40.4, 41.6) | 43.2<br>(41.6, 44.8) | 1.6<br>(0.7, 2.6)                            | 5.4<br>(3.5, 7.2) | 1.05<br>(1.02, 1.08)                        | <.001   | 1.18<br>(1.12, 1.25) | <.001   |
| All-cause mortality or readmission        | 53.1<br>(52.5, 53.8)   | 56.6<br>(56.0, 57.2) | 57.8<br>(56.2, 59.4) | 2.0<br>(1.2, 2.8)                            | 4.7<br>(3.1, 6.2) | 1.07<br>(1.04, 1.10)                        | <.001   | 1.16<br>(1.11, 1.22) | <.001   |
| Cardiovascular readmission                | 18.6<br>(18.1, 19.1)   | 19.9<br>(19.5, 20.4) | 22.3<br>(21.0, 23.7) | 0.8<br>(-0.1, 1.6)                           | 3.9<br>(2.2, 5.7) | 1.04<br>(1.00, 1.08)                        | .08     | 1.21<br>(1.12, 1.30) | <.001   |
| Recurrent stroke readmission <sup>c</sup> | 8.9<br>(8.6, 9.3)      | 9.2<br>(8.8, 9.5)    | 10.5<br>(9.5, 11.5)  | 0.1<br>(-0.6, 0.7)                           | 1.8<br>(0.5, 3.1) | 1.01<br>(0.95, 1.07)                        | .81     | 1.18<br>(1.05, 1.32) | .006    |

<sup>a</sup> For absolute difference, a positive value indicates an increase in risk and a negative value indicates a reduction in risk. Door-to-Needle times ≤60 minutes was used as reference standard

<sup>b</sup> Door-to-Needle times ≤60 minutes was used as reference standard. The models included 56870 patients for all-cause mortality and 51645 patients for the readmission outcomes after excluding 4556 and 3967 patients respectively, with missing data on hospital characteristics and National Institute of Health Stroke Scale. The difference in number of observation in the models represented in-hospital death. Models adjusted for patient age, sex, race-ethnicity; vascular risk factors including atrial fibrillation/flutter, previous stroke/transient ischemic attack, history of coronary artery disease/myocardial infarction, heart failure, carotid stenosis, diabetes mellitus, peripheral artery disease, hypertension, dyslipidemia, smoking, arrival by Emergency Medical Services, arrival during off hours, stroke severity as measured by the National Institutes of Health Stroke Scale (NIHSS), hospital region, urban/rural location, total number of beds, annual ischemic stroke volume, academic status, stroke center certification status and Target Stroke Initiative (using admission time before or after 2010).

<sup>c</sup> Recurrent stroke readmission, a post hoc outcome, was defined as readmission for transient ischemic attack, ischemic and hemorrhagic stroke, carotid endarterectomy or stenting, but not direct complications of index stroke.

**eTable 5.** Outcomes at one year by door-to-needle time in 45-minute increments

| Door-to-Needle Time                       | Event Rate, % (95% CI) |                      |                      | Absolute Difference, % (95% CI) <sup>a</sup> |                    | Adjusted Hazard Ratio (95% CI) <sup>b</sup> |         |                      |         |
|-------------------------------------------|------------------------|----------------------|----------------------|----------------------------------------------|--------------------|---------------------------------------------|---------|----------------------|---------|
|                                           | ≤ 45 min               | 46-90 min            | >90 min              | 46-90 min                                    | >90 min            | 46-90 min                                   | P value | >90 min              | P value |
| All-cause mortality                       | 30.8<br>(30.0, 31.6)   | 34.5<br>(34.0, 35.0) | 36.3<br>(35.5, 37.1) | 2.6<br>(1.7, 3.4)                            | 3.4<br>(2.4, 4.4)  | 1.12<br>(1.08, 1.17)                        | <.001   | 1.17<br>(1.11, 1.22) | <.001   |
| All-cause readmission                     | 38.4<br>(37.5, 39.3)   | 40.4<br>(39.8, 40.9) | 42.0<br>(41.1, 42.9) | 2.2<br>(1.0, 3.3)                            | 3.7<br>(2.4, 5.1)  | 1.07<br>(1.03, 1.11)                        | <.001   | 1.12<br>(1.08, 1.17) | <.001   |
| All-cause mortality or readmission        | 52.1<br>(51.1, 53.0)   | 55.3<br>(54.7, 55.8) | 57.7<br>(56.9, 58.6) | 2.3<br>(1.3, 3.2)                            | 3.8<br>(2.6, 5.0)  | 1.08<br>(1.04, 1.11)                        | <.001   | 1.13<br>(1.09, 1.17) | <.001   |
| Cardiovascular readmission                | 18.4<br>(17.7, 19.1)   | 19.3<br>(18.9, 19.8) | 20.9<br>(20.2, 21.7) | 0.7<br>(-0.3, 1.7)                           | 1.9<br>(0.6, 3.1)  | 1.04<br>(0.98, 1.09)                        | .17     | 1.10<br>(1.03, 1.17) | .003    |
| Recurrent stroke readmission <sup>c</sup> | 8.8<br>(8.3, 9.3)      | 9.1<br>(8.8, 9.4)    | 9.6<br>(9.1, 10.1)   | 0.3<br>(-0.4, 1.1)                           | 0.8<br>(-0.1, 1.7) | 1.03<br>(0.96, 1.11)                        | .35     | 1.08<br>(0.99, 1.18) | .08     |

<sup>a</sup> For absolute difference, a positive value indicates an increase in risk and a negative value indicates a reduction in risk. Door-to-Needle time ≤45 minutes was used as reference standard

<sup>b</sup> Door-to-Needle time ≤45 minutes was used as reference standard. The models included 56870 patients for all-cause mortality and 51645 patients for the readmission outcomes after excluding 4556 and 3967 patients respectively, with missing data on hospital characteristics and National Institute of Health Stroke Scale. The difference in number of observation in the models represented in-hospital death. Models adjusted for patient age, sex, race-ethnicity; vascular risk factors including atrial fibrillation/flutter, previous stroke/transient ischemic attack, history of coronary artery disease/myocardial infarction, heart failure, carotid stenosis, diabetes mellitus, peripheral artery disease, hypertension, dyslipidemia, smoking, arrival by Emergency Medical Services, arrival during off hours, stroke severity as measured by the National Institutes of Health Stroke Scale (NIHSS), hospital region, urban/rural location, total number of beds, annual ischemic stroke volume, academic status, stroke center certification status and Target: Stroke Initiative (using admission time before or after 2010).

<sup>c</sup> Recurrent stroke readmission, a post hoc outcome, was defined as readmission for transient ischemic attack, ischemic and hemorrhagic stroke, carotid endarterectomy or stenting, but not direct complications of index stroke.

**eTable 6.** Sensitivity analysis: outcomes at one year by door-to-needle times in 15-minute increments in 2015 and 2016

| Door-to-Needle Time, min                     | ≤ 30                 | 31–45                | 46–60                | 61–75                | >75                  | Per 15-min Increment <sup>d</sup>               |                                                |
|----------------------------------------------|----------------------|----------------------|----------------------|----------------------|----------------------|-------------------------------------------------|------------------------------------------------|
| <b>All-cause mortality</b>                   |                      |                      |                      |                      |                      | Per 15-min Increment within 90 min <sup>d</sup> | Per 15-min Increment after 90 min <sup>d</sup> |
| Event rate, % (95% CI)                       | 30.0<br>(28.2, 32.1) | 28.8<br>(27.5, 30.2) | 31.8<br>(30.6, 33.1) | 31.6<br>(30.0, 33.3) | 32.0<br>(30.7, 33.4) | -                                               | -                                              |
| Absolute difference, % (95% CI) <sup>a</sup> | reference            | -0.4 (-2.4, 1.7)     | 2.7 (0.7, 4.7)       | 1.8 (-0.3, 4.0)      | 3.8 (1.7, 5.9)       | -                                               | -                                              |
| Unadjusted hazard ratio (95% CI)             | reference            | 0.95<br>(0.83, 1.08) | 1.07<br>(0.94, 1.22) | 1.05<br>(0.92, 1.21) | 1.07<br>(0.94, 1.23) | 1.03 (1.01, 1.06)                               | 0.98 (0.94, 1.01)                              |
| P value                                      |                      | .33                  | .19                  | .37                  | .21                  | .006                                            | .22                                            |
| Adjusted hazard ratio (95% CI) <sup>b</sup>  | reference            | 0.98<br>(0.88, 1.09) | 1.14<br>(1.03, 1.26) | 1.09<br>(0.97, 1.23) | 1.20<br>(1.08, 1.34) | 1.04 (1.02, 1.06)                               | 1.03 (0.99, 1.07)                              |
| P value                                      |                      | .74                  | .01                  | .13                  | <.001                | <.001                                           | .17                                            |
| <b>All-cause readmission</b>                 |                      |                      |                      |                      |                      | Per 15-min Increment                            |                                                |
| Event rate, % (95% CI)                       | 36.5<br>(34.3, 39.9) | 36.8<br>(35.4, 38.4) | 37.9<br>(36.5, 39.3) | 38.7<br>(36.9, 40.5) | 39.3<br>(37.8, 40.9) | -                                               |                                                |
| Absolute difference, % (95% CI) <sup>a</sup> |                      | 0.1 (-2.7, 3.0)      | 2.7 (-0.1, 5.5)      | 2.9 (-0.2, 6.0)      | 4.8 (1.8, 7.7)       | -                                               |                                                |
| Unadjusted HR (95% CI)                       | reference            | 1.01<br>(0.90, 1.13) | 1.07<br>(0.95, 1.19) | 1.09<br>(0.97, 1.23) | 1.11<br>(0.99, 1.25) | 1.02 (1.01, 1.03)                               |                                                |
| P value                                      |                      | .85                  | .17                  | .07                  | .02                  | .005                                            |                                                |
| Adjusted hazard ratio (95% CI) <sup>b</sup>  | reference            | 1.00<br>(0.91, 1.10) | 1.09<br>(1.00, 1.20) | 1.10<br>(1.00, 1.21) | 1.17<br>(1.06, 1.28) | 1.03<br>(1.02, 1.04)                            |                                                |
| P value                                      |                      | .94                  | .06                  | .06                  | .001                 | <.001                                           |                                                |
| <b>All-cause mortality or readmission</b>    |                      |                      |                      |                      |                      | Per 15-min Increment                            |                                                |
| Event rate, % (95% CI)                       | 49.6<br>(47.2, 52.0) | 50.1<br>(48.5, 51.6) | 52.2<br>(50.8, 53.7) | 52.9<br>(51.0, 54.7) | 53.9<br>(52.3, 55.5) | -                                               |                                                |
| Absolute difference, % (95% CI) <sup>a</sup> | reference            | 0.7 (-1.7, 3.2)      | 3.4 (1.0, 5.8)       | 3.1 (0.4, 5.7)       | 5.7 (3.2, 8.2)       | -                                               |                                                |
| Unadjusted hazard ratio (95% CI)             | reference            | 1.01<br>(0.91, 1.12) | 1.08<br>(0.98, 1.19) | 1.09<br>(0.99, 1.22) | 1.12<br>(1.01, 1.24) | 1.02 (1.00, 1.03)                               |                                                |
| P value                                      |                      | .83                  | .07                  | .04                  | .009                 | .007                                            |                                                |
| Adjusted hazard ratio (95% CI) <sup>b</sup>  | reference            | 1.02<br>(0.94, 1.12) | 1.12<br>(1.02, 1.22) | 1.10<br>(1.01, 1.21) | 1.20<br>(1.10, 1.31) | 1.03 (1.01, 1.05)                               |                                                |
| P value                                      |                      | .58                  | .01                  | .03                  | <.001                | <.001                                           |                                                |

| Door-to-Needle Time, min                        | ≤ 30                 | 31–45                | 46–60                | 61–75                | >75                  | Per 15-min Increment <sup>d</sup>               |                                                |
|-------------------------------------------------|----------------------|----------------------|----------------------|----------------------|----------------------|-------------------------------------------------|------------------------------------------------|
| <b>Cardiovascular readmission</b>               |                      |                      |                      |                      |                      | Per 15-min Increment within 60 min <sup>d</sup> | Per 15-min Increment after 60 min <sup>d</sup> |
| Event rate, % (95% CI)                          | 16.8<br>(15.1, 18.7) | 16.8<br>(15.6, 18.0) | 17.4<br>(16.3, 18.5) | 17.9<br>(16.5, 19.4) | 18.4<br>(17.2, 19.6) | -                                               | -                                              |
| Absolute difference, % (95% CI) <sup>a</sup>    | reference            | -0.2 (-2.7, 2.3)     | 1.2 (-1.3, 3.7)      | 1.0 (-1.7, 3.7)      | 2.2 (-0.4, 4.8)      | -                                               | -                                              |
| Unadjusted hazard ratio (95% CI)                | reference            | 1.02<br>(0.88, 1.17) | 1.07<br>(0.93, 1.23) | 1.09<br>(0.94, 1.27) | 1.15<br>(1.00, 1.32) | 1.03 (0.98, 1.08)                               | 1.03 (1.00, 1.06)                              |
| P value                                         |                      | .82                  | .32                  | .25                  | .05                  | .24                                             | .06                                            |
| Adjusted hazard ratio (95% CI) <sup>b</sup>     | reference            | 0.99<br>(0.86, 1.14) | 1.07<br>(0.93, 1.22) | 1.06<br>(0.91, 1.23) | 1.13<br>(0.98, 1.30) | 1.02 (0.97, 1.07)                               | 1.03 (1.00, 1.06)                              |
| P value                                         |                      | .89                  | .34                  | .46                  | .09                  | .40                                             | .03                                            |
| <b>Recurrent stroke readmission<sup>c</sup></b> |                      |                      |                      |                      |                      | Per 15-min Increment within 60 min <sup>d</sup> | Per 15-min Increment after 60 min <sup>d</sup> |
| Event rate, % (95% CI)                          | 8.5 (7.2, 9.9)       | 8.4 (7.6, 9.3)       | 8.7 (8.0, 9.6)       | 8.3 (7.3, 9.4)       | 8.9 (8.1, 9.9)       | -                                               | -                                              |
| Absolute difference, % (95% CI) <sup>a</sup>    | reference            | 0.1 (-1.7, 1.9)      | 1.0 (-0.9, 2.8)      | -0.0 (-2.0, 1.9)     | 1.2 (-0.7, 3.1)      | -                                               | -                                              |
| Unadjusted hazard ratio (95% CI)                | reference            | 1.02<br>(0.84, 1.23) | 1.09<br>(0.90, 1.32) | 1.00<br>(0.81, 1.23) | 1.12<br>(0.92, 1.35) | 1.02<br>(0.95, 1.09)                            | 1.01<br>(0.98, 1.05)                           |
| P value                                         |                      | .85                  | .37                  | 1.0                  | .26                  | .67                                             | .47                                            |
| Adjusted hazard ratio (95% CI) <sup>b</sup>     | reference            | 1.01<br>(0.84, 1.23) | 1.10<br>(0.91, 1.34) | 1.00<br>(0.80, 1.23) | 1.13<br>(0.93, 1.38) | 1.02 (0.95, 1.10)                               | 1.02 (0.98, 1.06)                              |
| P value                                         |                      | .90                  | .31                  | .97                  | .22                  | .61                                             | .38                                            |

The population informed all-cause mortality was 18242. The population informed readmission was 16860. The difference represented in-hospital death.

<sup>a</sup> For absolute difference, a positive value indicates an increase in risk and a negative value indicates a reduction in risk.

<sup>b</sup> Models adjusted for patient age, sex, race-ethnicity; vascular risk factors including atrial fibrillation/flutter, previous stroke/transient ischemic attack, history of coronary artery disease/myocardial infarction, heart failure, carotid stenosis, diabetes mellitus, peripheral artery disease, hypertension, dyslipidemia, smoking, arrival by Emergency Medical Services, arrival during off hours, stroke severity as measured by the National Institutes of Health Stroke Scale (NIHSS), hospital region, urban/rural location, total number of beds, annual ischemic stroke volume, academic status, stroke center certification status.

<sup>c</sup> Recurrent stroke readmission, a post hoc outcome, was defined as readmission for transient ischemic attack, ischemic and hemorrhagic stroke, carotid endarterectomy or stenting, but not direct complications of index stroke.

<sup>d</sup> The cutoff value was derived from non-linear distribution as shown in the spline plot. The absence of cut-off times for all-cause readmission and the composite of all-cause mortality or readmission was because these two outcomes showed linear distribution in relation to door-to-needle times in 15-minute increments within 4.5 hours.
